# Supplementary material
Source: PubMed Central journal article supplement (PMC3754329)
Supplement: AAC.00913-13_zac999102099so1.pdf [file AAC.00913-13_zac999102099so1.pdf]

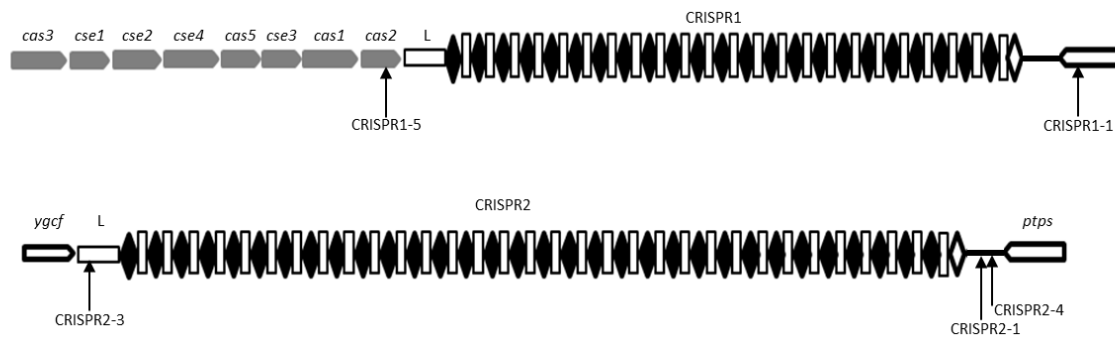

**Fig. S1** Schematic of CRISPR loci in *Salmonella* Typhimurium (oriented 5' to 3'). Direct repeats and spacers are represented by black diamonds and white rectangles, respectively. The terminal direct repeats are represented by white diamonds. L stands for leader sequence. *cas* genes are in grey while other core flanking genes (*ygcF*, *iap* and *ptsP*) are in white. The locations of PCR and flanking sequencing primers are indicated with arrows. The figure is not drawn to scale.

Supplemental Table S1

| Accession | Submitted | Farm | Source                         | Final Allele | Std. Allele | CRISPR1 Allele | CRISPR2 Allele | CRISPR3/MSL1 (ST) | Ampicillin | Ceftriaxone | Chlortetracycline | Clindamycin | Doxiflaxacin | Fenofibrate | Fluorfenicol | Gentamicin | Neomycin | Oxytetracycline | Penicillin | Spectinomycin | Sulphonamides | Tiamulin | Tilmicosin | Trimethoprim/Sulphonamides | Toltriamazine | Tylosin (Tetracycline) |
|-----------|-----------|------|--------------------------------|--------------|-------------|----------------|----------------|-------------------|------------|-------------|-------------------|-------------|--------------|-------------|--------------|------------|----------|-----------------|------------|---------------|---------------|----------|------------|----------------------------|---------------|------------------------|
| P060555   | 2/24/09   | AJ   | poultry (meat)                 | allele 9     | allele 15   | allele 11      | allele 10      | TST 10            | R          | S           | R                 | NI          | S            | S           | S            | S          | S        | R               | R          | R             | R             | R        | R          | R                          | R             | R                      |
| P090147   | 3/4/09    | AJ   | cattle                         | allele 8     | allele 15   | allele 11      | allele 10      | TST 10            | R          | S           | S                 | R           | NI           | S           | 1            | S          | S        | S               | R          | R             | R             | R        | R          | R                          | R             | R                      |
| P0901624  | 10/28/09  | AK   | swine                          | allele 8     | allele 15   | allele 11      | allele 10      | TST 10            | R          | S           | R                 | NI          | S            | R           | S            | S          | S        | R               | R          | R             | R             | R        | R          | R                          | R             | R                      |
| P1019624  | 7/28/10   | AM   | cattle                         | allele 8     | allele 15   | allele 11      | allele 10      | TST 10            | R          | S           | R                 | NI          | S            | R           | S            | S          | S        | R               | R          | R             | R             | R        | R          | R                          | R             | R                      |
| P1020529  | 8/6/10    | AM   | cattle                         | allele 8     | allele 15   | allele 11      | allele 10      | TST 10            | R          | S           | R                 | NI          | S            | R           | S            | S          | S        | R               | R          | R             | R             | R        | R          | R                          | R             | R                      |
| P1023387  | 9/7/10    | AM   | cattle                         | allele 8     | allele 15   | allele 11      | allele 10      | TST 10            | R          | S           | R                 | NI          | S            | R           | S            | S          | S        | R               | R          | R             | R             | R        | R          | R                          | R             | R                      |
| P123458   | 11/21/11  | AO   | poultry                        | allele 8     | allele 15   | allele 11      | allele 10      | TST 10            | R          | S           | R                 | NI          | S            | R           | S            | S          | S        | R               | R          | R             | R             | R        | R          | R                          | R             | R                      |
| P0903703  | 11/18/09  | AS   | cattle                         | allele 8     | allele 15   | allele 11      | allele 10      | TST 10            | S          | R           | S                 | R           | NI           | S           | R            | S          | S        | S               | R          | R             | R             | R        | R          | R                          | R             | R                      |
| P1026056  | 10/4/10   | G    | cattle                         | allele 8     | allele 15   | allele 11      | allele 10      | TST 10            | R          | S           | R                 | NI          | S            | R           | S            | S          | S        | R               | R          | R             | R             | R        | R          | R                          | R             | R                      |
| P1122481  | 9/2/11    | GG   | cattle                         | allele 8     | allele 15   | allele 11      | allele 10      | TST 10            | R          | R           | R                 | NI          | S            | R           | S            | S          | S        | R               | R          | R             | R             | R        | R          | R                          | R             | R                      |
| P0837179  | 9/14/08   | H    | cattle                         | allele 8     | allele 15   | allele 11      | allele 10      | TST 10            | R          | R           | R                 | NI          | S            | R           | S            | S          | S        | R               | R          | R             | R             | R        | R          | R                          | R             | R                      |
| P0930463  | 10/16/09  | H    | poultry                        | allele 8     | allele 15   | allele 11      | allele 10      | TST 10            | R          | S           | R                 | NI          | S            | R           | S            | S          | S        | R               | R          | R             | R             | R        | R          | R                          | R             | R                      |
| P0908862  | 4/7/10    | IA   | avian (Bench guinea fow)       | allele 8     | allele 15   | allele 11      | allele 10      | TST 10            | R          | R           | R                 | NI          | S            | R           | S            | S          | S        | R               | R          | R             | R             | R        | R          | R                          | R             | R                      |
| P0920389  | 10/7/09   | IB   | piglet                         | allele 8     | allele 15   | allele 11      | allele 10      | TST 10            | R          | R           | R                 | NI          | S            | R           | S            | S          | S        | R               | R          | R             | R             | R        | R          | R                          | R             | R                      |
| P1130073  | 11/18/11  | AR   | cattle                         | allele 8     | allele 15   | allele 10      | allele 14      | TST 12            | S          | S           | R                 | NI          | S            | 1           | S            | S          | S        | R               | R          | R             | R             | R        | R          | R                          | R             | R                      |
| P0837177  | 9/18/08   | R    | cattle                         | allele 6     | allele 15   | allele 10      | allele 14      | TST 12            | S          | S           | S                 | R           | NI           | S           | 1            | S          | S        | S               | R          | R             | R             | R        | R          | R                          | R             | R                      |
| P1107219  | 3/28/11   | AC   | cattle                         | allele 6     | allele 15   | allele 129     | allele 162     | TST 13            | R          | S           | R                 | NI          | S            | 1           | S            | S          | S        | R               | R          | R             | R             | R        | R          | R                          | R             | R                      |
| P1122935  | 9/8/11    | AE   | cattle                         | allele 6     | allele 15   | allele 129     | allele 162     | TST 13            | S          | S           | R                 | NI          | S            | 1           | S            | S          | S        | R               | R          | R             | R             | R        | R          | R                          | R             | R                      |
| P1122148  | 8/30/11   | AO   | deer                           | allele 6     | allele 15   | allele 129     | allele 162     | TST 13            | S          | S           | S                 | R           | NI           | S           | 1            | S          | S        | S               | R          | R             | R             | R        | R          | R                          | R             | R                      |
| P0902275  | 6/22/09   | N    | cattle                         | allele 6     | allele 15   | allele 129     | allele 162     | TST 13            | S          | S           | S                 | R           | NI           | S           | 1            | S          | S        | S               | R          | R             | R             | R        | R          | R                          | R             | R                      |
| P1025997  | 11/4/10   | Y    | poultry (broiler)              | allele 6     | allele 15   | allele 129     | allele 162     | TST 13            | R          | S           | R                 | NI          | S            | 1           | S            | S          | S        | R               | R          | R             | R             | R        | R          | R                          | R             | R                      |
| P1101337  | 1/17/11   | Y    | avian (commercial turkey meat) | allele 6     | allele 15   | allele 129     | allele 162     | TST 13            | R          | S           | R                 | NI          | S            | 1           | R            | S          | S        | R               | R          | R             | R             | R        | R          | R                          | R             | R                      |
| P0826262  | 7/22/08   | A    | cattle                         | allele 6     | allele 15   | allele 129     | allele 162     | TST 17            | S          | S           | S                 | R           | NI           | S           | 1            | S          | S        | S               | R          | R             | R             | R        | R          | R                          | R             | R                      |
| P0834134  | 9/22/08   | AF   | cattle                         | allele 6     | allele 15   | allele 129     | allele 162     | TST 17            | R          | S           | R                 | NI          | S            | 1           | R            | S          | S        | R               | R          | R             | R             | R        | R          | R                          | R             | R                      |
| P0836990  | 10/13/08  | AF   | cattle                         | allele 6     | allele 15   | allele 10      | allele 167     | TST 17            | S          | S           | S                 | R           | NI           | S           | 1            | S          | S        | S               | R          | R             | R             | R        | R          | R                          | R             | R                      |
| P0909065  | 1/19/09   | M    | cattle                         | allele 6     | allele 15   | allele 10      | allele 167     | TST 17            | S          | S           | S                 | R           | NI           | S           | 1            | S          | S        | S               | R          | R             | R             | R        | R          | R                          | R             | R                      |
| P1017409  | 7/7/10    | T    | cattle                         | allele 6     | allele 15   | allele 10      | allele 167     | TST 17            | R          | S           | R                 | NI          | S            | 1           | S            | S          | S        | R               | R          | R             | R             | R        | R          | R                          | R             | R                      |
| P1114278  | 6/14/11   | AD   | cattle                         | allele 6     | allele 62   | allele 10      | allele 164     | TST 19            | S          | S           | S                 | R           | NI           | S           | 1            | S          | S        | S               | R          | R             | R             | R        | R          | R                          | R             | R                      |
| P0811445  | 8/29/08   | D    | cattle                         | allele 6     | allele 62   | allele 10      | allele 164     | TST 19            | S          | S           | S                 | R           | NI           | S           | 1            | S          | S        | S               | R          | R             | R             | R        | R          | R                          | R             | R                      |
| P0817189  | 9/3/08    | E    | cattle                         | allele 6     | allele 62   | allele 10      | allele 164     | TST 19            | S          | S           | S                 | R           | NI           | S           | 1            | S          | S        | S               | R          | R             | R             | R        | R          | R                          | R             | R                      |
| P0834300  | 9/23/08   | I    | cattle                         | allele 6     | allele 62   | allele 10      | allele 164     | TST 19            | S          | S           | S                 | R           | NI           | S           | 1            | S          | S        | S               | R          | R             | R             | R        | R          | R                          | R             | R                      |
| P0840888  | 11/18/08  | L    | cattle                         | allele 6     | allele 62   | allele 10      | allele 164     | TST 19            | S          | S           | S                 | R           | NI           | S           | 1            | S          | S        | S               | R          | R             | R             | R        | R          | R                          | R             | R                      |
| P102221   | 9/3/10    | IA   | avian (turkey value)           | allele 6     | allele 62   | allele 10      | allele 164     | TST 19            | S          | S           | S                 | R           | NI           | S           | 5            | S          | S        | S               | R          | NI            | R             | R        | R          | R                          | R             | R                      |
| P0922081  | 7/24/09   | IA   | cattle                         | allele 6     | allele 62   | allele 10      | allele 164     | TST 19            | S          | S           | S                 | R           | NI           | S           | 1            | S          | S        | S               | R          | R             | R             | R        | R          | R                          | R             | R                      |
| P0929020  | 10/24/09  | P    | cattle                         | allele 6     | allele 62   | allele 10      | allele 164     | TST 19            | S          | S           | S                 | R           | NI           | S           | 1            | S          | S        | S               | R          | R             | R             | R        | R          | R                          | R             | R                      |
| P1010922  | 4/29/10   | R    | cattle                         | allele 6     | allele 62   | allele 10      | allele 164     | TST 19            | S          | S           | S                 | R           | NI           | S           | 1            | S          | S        | S               | R          | R             | R             | R        | R          | R                          | R             | R                      |
| P1017919  | 7/12/10   | U    | cattle                         | allele 6     | allele 62   | allele 10      | allele 164     | TST 19            | S          | S           | S                 | R           | NI           | S           | 1            | S          | S        | S               | R          | R             | R             | R        | R          | R                          | R             | R                      |
| P1024851  | 9/21/10   | V    | cattle                         | allele 6     | allele 62   | allele 10      | allele 164     | TST 19            | S          | S           | S                 | R           | NI           | S           | 1            | S          | S        | S               | R          | R             | R             | R        | R          | R                          | R             | R                      |
| P1030514  | 11/16/10  | Z    | cattle                         | allele 6     | allele 62   | allele 10      | allele 164     | TST 19            | S          | S           | S                 | R           | NI           | S           | 1            | S          | S        | S               | R          | R             | R             | R        | R          | R                          | R             | R                      |
| P0902422  | 11/23/09  | AB   | cattle                         | allele 6     | allele 15   | allele 10      | allele 181     | TST 42            | R          | R           | R                 | NI          | S            | R           | R            | R          | R        | R               | R          | R             | R             | R        | R          | R                          | R             | R                      |
| P1117070  | 7/12/11   | AN   | none (water source)            | allele 6     | allele 15   | allele 10      | allele 181     | TST 42            | S          | S           | S                 | R           | NI           | S           | 1            | S          | S        | S               | R          | R             | R             | R        | R          | R                          | R             | R                      |
| P0828226  | 8/6/08    | B    | cattle                         | allele 6     | allele 15   | allele 10      | allele 181     | TST 42            | R          | R           | R                 | NI          | S            | R           | R            | R          | R        | R               | R          | R             | R             | R        | R          | R                          | R             | R                      |
| P0811213  | 8/28/08   | B    | cattle                         | allele 6     | allele 15   | allele 10      | allele 181     | TST 42            | R          | R           | R                 | NI          | S            | R           | R            | R          | R        | R               | R          | R             | R             | R        | R          | R                          | R             | R                      |
| P0920267  | 9/11/09   | B    | cattle                         | allele 6     | allele 15   | allele 10      | allele 181     | TST 42            | R          | R           | R                 | NI          | S            | R           | R            | R          | R        | R               | R          | R             | R             | R        | R          | R                          | R             | R                      |
| P0900565  | 1/7/09    | B    | cattle                         | allele 6     | allele 15   | allele 10      | allele 181     | TST 42            | R          | R           | R                 | NI          | S            | R           | R            | R          | R        | R               | R          | R             | R             | R        | R          | R                          | R             | R                      |
| P0901238  | 1/13/09   | B    | cattle                         | allele 6     | allele 15   | allele 10      | allele 181     | TST 42            | R          | R           | R                 | NI          | S            | R           | R            | R          | R        | R               | R          | R             | R             | R        | R          | R                          | R             | R                      |
| P0811991  | 8/28/08   | C    | cattle                         | allele 6     | allele 15   | allele 10      | allele 181     | TST 42            | S          | S           | S                 | R           | NI           | S           | 1            | S          | S        | S               | R          | R             | R             | R        | R          | R                          | R             | R                      |
| P0832868  | 9/11/08   | F    | cattle                         | allele 6     | allele 15   | allele 10      | allele 181     | TST 42            | S          | S           | S                 | R           | NI           | S           | 1            | S          | S        | S               | R          | R             | R             | R        | R          | R                          | R             | R                      |
| P0833453  | 9/16/08   | G    | cattle                         | allele 6     | allele 15   | allele 10      | allele 181     | TST 42            | S          | S           | R                 | R           | NI           | S           | R            | R          | R        | R               | R          | R             | R             | R        | R          | R                          | R             | R                      |
| P0832954  | 9/11/08   | G    | cattle                         | allele 6     | allele 15   | allele 10      | allele 181     | TST 42            | R          | R           | R                 | NI          | S            | R           | R            | R          | R        | R               | R          | R             | R             | R        | R          | R                          | R             | R                      |
| P0836253  | 10/9/08   | J    | cattle                         | allele 6     | allele 15   | allele 10      | allele 181     | TST 42            | S          | S           | S                 | R           | NI           | S           | 1            | S          | S        | S               | R          | R             | R             | R        | R          | R                          | R             | R                      |
| P0838443  | 10/28/08  | K    | cattle                         | allele 6     | allele 15   | allele 10      | allele 181     | TST 42            | S          | S           | S                 | R           | NI           | S           | 1            | S          | S        | S               | R          | NI            | S             | R        | R          | R                          | R             | R                      |
| P0809150  | 11/18/08  | K    | poultry (eggs)                 | allele 6     | allele 15   | allele 10      | allele 181     | TST 42            | S          | S           | S                 | R           | NI           | S           | 1            | S          | S        | S               | R          | NI            | S             | R        | R          | R                          | R             | R                      |
| P0905145  | 2/24/09   | IA   | cattle                         | allele 6     | allele 15   | allele 10      | allele 182     | TST 43            | R          | S           | R                 | NI          | S            | 1           | S            | R          | R        | R               | R          | R             | R             | R        | R          | R                          | R             | R                      |
| P0905347  | 2/24/09   | IA   | avian (pecking birds)          | allele 7     | allele 15   | allele 144     | allele 14      | TST 44            | S          | S           | S                 | R           | NI           | S           | 1            | S          | S        | S               | R          | R             | R             | R        | R          | R                          | R             | R                      |
| P0905277  | 3/5/09    | IA   | avian (pecking birds)          | allele 7     | allele 15   | allele 144     | allele 14      | TST 44            | S          | S           | S                 | R           | NI           | S           | 1            | S          | S        | S               | R          | NI            | S             | R        | R          | R                          | R             | R                      |
| P0907443  | 3/16/09   | IA   | avian (pecking birds)          | allele 7     | allele 15   | allele 144     | allele 14      | TST 44            | S          | S           | S                 | R           | NI           | S           | 1            | S          | S        | S               | R          | NI            | S             | R        | R          | R                          | R             | R                      |
| P0907344  | 3/16/09   | IA   | avian (pecking birds)          | allele 7     | allele 15   | allele 144     | allele 14      | TST 44            | S          | S           | S                 | R           | NI           | S           | 1            | S          | S        | S               | R          | NI            | S             | R        | R          | R                          | R             | R                      |
| P0907352  | 3/18/09   | IA   | avian (pecking birds)          | allele 7     | allele 15   | allele 144     | allele 14      | TST 44            | S          | S           | S                 | R           | NI           | S           | 1            | S          | S        | S               | R          | NI            | S             | R        | R          | R                          | R             | R                      |
| P0907096  | 4/14/09   | IA   | avian (red tailed hawks)       | allele 7     | allele 15   | allele 144     | allele 14      | TST 44            | S          | S           | S                 | R           | NI           | S           | 1            | S          | S        | S               | R          | NI            | S             | R        | R          | R                          | R             | R                      |
| P0904689  | 2/18/09   | IA   | avian (pecking birds)          | allele 7     | allele 15   | allele 144     | allele 14      | TST 44            | S          | S           | S                 | R           | NI           | S           | 1            | S          | S        | S               | R          | NI            | S             | R        | R          | R                          | R             | R                      |
| P1003347  | 2/9/10    | Q    | poultry (broiler)              | allele 6     | allele 15   | allele 145     | allele 183     | TST 45            | R          | NA          | S                 | NA          | R            | NA          | S            | 1          | S        | S               | S          | R             | R             | R        | NA         | NA                         | NA            | NA                     |
| P1003853  | 2/19/10   | Q    | poultry (broiler)              | allele 6     | allele 15   | allele 145     | allele 183     | TST 45            | NA         | S           | NA                | R           | NA           | S           | 1            | S          | S        | S               | R          | R             | R             | NA       | NA         | NA                         | NA            | NA                     |
| P1016120  | 6/23/10   | S    | avian (commercial turkey meat) | allele 6     | allele 15   | allele 10      | allele 184     | TST 46            | NA         | S           | NA                | R           | NA           | S           | 1            | S          | S        | S               | R          | R             | R             | NA       | NA         | NA                         | NA            | NA                     |
| P1025715  | 9/29/10   | W    | cattle                         | allele 6     | allele 62   | allele 10      | allele 185     | TST 47            | R          | NI          | S                 | 1           | S            | S           | 1            | S          | S        | S               | R          | R             | R             | R        | R          | R                          | R             | R                      |
| P1025998  | 10/1/10   | X    | horse                          | allele 6     | allele 15   | allele 146     | allele 184     | TST 48            | S          | S           | NA                | NA          | NA           | S           | NA           | S          | NA       | NA              | R          | NA            | NA            | NA       | NA         | NA                         | NA            | NA                     |
| P1106154  | 3/15/11   | AA   | cattle                         | allele 6     | allele 15   | allele 147     | allele 164     | TST 49            | S          | S           | S                 | R           | NI           | S           | 1            | S          | S        | S               | R          | R             | R             | R        | R          | R                          | R             | R                      |
| P1107214  | 3/25/11   | AB   | cattle                         | allele 6     | allele      |                |                |                   |            |             |                   |             |              |             |              |            |          |                 |            |               |               |          |            |                            |               |                        |

**Table S2** Names and sequences of all primers used for PCR and sequencing of CRISPR-MVSLT loci

| Primer Name | Sequence (5' to 3')             | Application                                |
|-------------|---------------------------------|--------------------------------------------|
| fimH-1      | AGGTGAACTGTTTCATCCAGTGG         | <i>fimH</i> PCR and sequencing             |
| fimH-2      | GCGGGCTGAACAAAACACAA            | <i>fimH</i> PCR and sequencing             |
| fimH-3      | GCGCGTCGTTATTTAGTC              | <i>fimH</i> internal sequencing            |
| fimH-4      | GGACAGGTCGTGGAGTTT              | <i>fimH</i> internal sequencing            |
| sseL-1      | AAAATCAGGTCTATGCCTGATTTAATATATC | <i>sseL</i> PCR                            |
| sseL-3      | ACCAGGAAACAGAGCAAAATGAATATATGT  | <i>sseL</i> sequencing                     |
| sseL-4      | TTCTCTCGTAAACTATCCTATTGGGC      | <i>sseL</i> sequencing                     |
| sseL-5      | GGCTCTAAGTACTCRCCATTACT         | <i>sseL</i> PCR                            |
| CRISPR1-1   | GATGTAGTGCGGATAATGCT            | CRISPR1 PCR and sequencing                 |
| CRISPR1-5   | GGTTTCTTTCTTCTCTGTTG            | CRISPR1 PCR and sequencing                 |
| CRISPR1-8   | GCCATTATCAACCCTCCAG             | CRISPR1 internal sequencing                |
| CRISPR1-9   | TATCGTTAAGACTGAAGGAAG           | CRISPR1 internal sequencing                |
| CRISPR2-1   | GCAATACCCTGATCCTTAACGCCA        | CRISPR2 sequencing                         |
| CRISPR2-3   | ATTGTTGCGATTATGTTGGT            | CRISPR2 PCR and sequencing                 |
| CRISPR2-4   | TCCAGCTCCCTTATGATTTT            | CRISPR2 PCR                                |
| CRISPR2-5   | CGACGAAATAAAACCGAACT            | CRISPR2 internal sequencing                |
| CRISPR2-6   | CGGATTCCATGCGTTTTCA             | CRISPR2 internal sequencing                |
| CRISPR2-7   | CCGGCGAGGTCAATAAAA              | CRISPR2 internal sequencing                |
| CRISPR2-8   | TGACGCTGGTCTATACCG              | CRISPR2 internal sequencing                |
| CRISPR2-9   | GTGACGTCAGTGCCGAA               | CRISPR2 internal sequencing                |
| CRISPR2-10  | CTCTTCGCACTCTCGATCAA            | CRISPR2 internal sequencing                |
| CRISPR2-11  | ACACAGCCCCGTCCAGAA              | CRISPR2 internal sequencing                |
| CRISPR2-12  | AAGTTTGGGTAAATTGGACACG          | CRISPR2 internal sequencing                |
| CRISPR2-13  | ACCGTGCAGAGTTGTATC              | CRISPR2 internal sequencing                |
| CRISPR2-14  | TATTTGCTATCAGTTACATC            | CRISPR2 internal sequencing                |
| CRISPR2-15  | AATCGCCAGCCTCGGAAATA            | CRISPR2 internal sequencing                |
| CRISPR2-16  | TTTTTCTGTTCTGTTTCG              | CRISPR2 internal sequencing                |
| CRISPR2-17  | CTAGGAGGCGTAATGAATAC            | CRISPR2 internal sequencing                |
| CRISPR2-18  | ACGTGGTGGCCTCAAATAA             | CRISPR2 internal sequencing                |
| CRISPR2-19  | AACGAACTGAATAAAATGTC            | CRISPR2 internal sequencing                |
| CRISPR2-20  | GAAAGTGACGCGGCTTAT              | CRISPR2 internal sequencing                |
| CRISPR2-21  | CGGCAGCGGTTGAGTAA               | CRISPR2 internal sequencing                |
| CRISPR2-22  | CCACCAAAGCGAGAACAAA             | CRISPR2 internal sequencing (targets IS10) |
| CRISPR2-23  | GCCACGCATTACTTGACTGT            | CRISPR2 internal sequencing (targets IS10) |
| CRISPR2-24  | CGTTTTGATATCATGCTGCTAA          | CRISPR2 internal sequencing (targets IS10) |
| CRISPR2-25  | TTCCAGGCTAACACAGTCAGA           | CRISPR2 internal sequencing (targets IS10) |
| CRISPR2-26  | GGCTGTTTAGTTCTGTTGT             | CRISPR2 internal sequencing                |

**Table S3** Distribution of antibiotic resistance by TST

| CRISPR-MVLST | Total Isolates Screened | Ampicillin |    | Ceftiofur |    | Chlorotetracycline |    | Gentamicin |    | Neomycin |    | Oxytetracycline |    | Trimethoprim/Sulphamethoxazole |    |
|--------------|-------------------------|------------|----|-----------|----|--------------------|----|------------|----|----------|----|-----------------|----|--------------------------------|----|
|              |                         | R          | S  | R         | S  | R                  | S  | R          | S  | R        | S  | R               | S  | R                              | S  |
| TST 10       | 19                      | 17         | 2  | 3         | 16 | 15                 | 4  | 0          | 19 | 1        | 18 | 15              | 4  | 2                              | 17 |
| TST 13       | 12                      | 3          | 9  | 0         | 12 | 3                  | 9  | 3          | 9  | 0        | 12 | 3               | 9  | 0                              | 12 |
| TST 17       | 11                      | 0          | 11 | 0         | 11 | 0                  | 11 | 0          | 11 | 0        | 11 | 0               | 11 | 0                              | 11 |
| TST 19       | 18                      | 1          | 17 | 1         | 17 | 0                  | 18 | 0          | 18 | 0        | 18 | 0               | 18 | 0                              | 17 |
| TST 42       | 15                      | 7          | 8  | 7         | 8  | 8                  | 7  | 7          | 8  | 8        | 7  | 8               | 7  | 5                              | 10 |
| TST 44       | 8                       | 0          | 8  | 0         | 8  | 0                  | 8  | 0          | 8  | 0        | 8  | 0               | 8  | 0                              | 8  |
|              |                         | p<0.001    |    | P=0.003   |    | p<0.001            |    | p<0.001    |    | p<0.001  |    | p<0.001         |    | p=0.007                        |    |

The distribution of resistant and sensitive isolates for each of the seven antibiotics which significantly differed by sequence type is listed. The total isolates screened for TSTs 10, 13, 17, and 19 include 6 epidemiologically unlinked human clinical isolates in addition to all available isolates in the ADL collection, TST 42 includes only two clinical isolates, and no clinical isolates were identified with TST 44. P-values reflect the results of Fisher's exact test.
